# Supplementary material
Source: PubMed Central journal article supplement (PMC5705201)

A

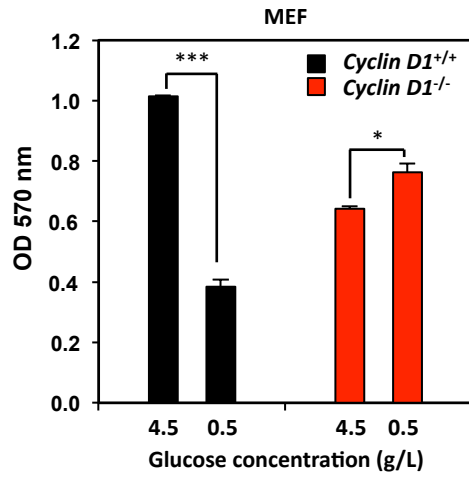

B

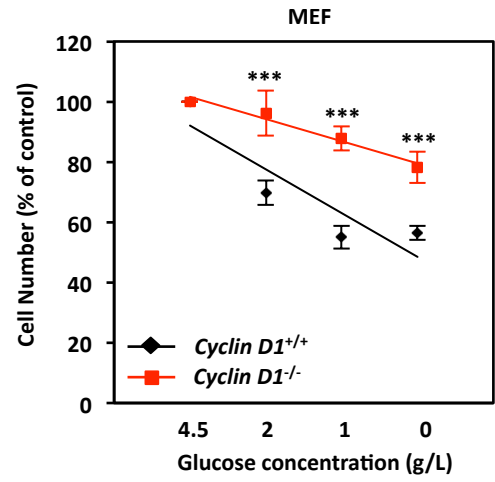

Supplement: NIHMS875725-supplement-2.pdf [file NIHMS875725-supplement-2.pdf]

**A**

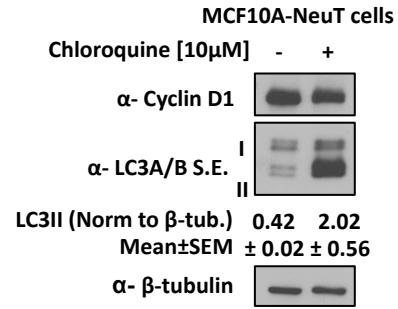

**B**

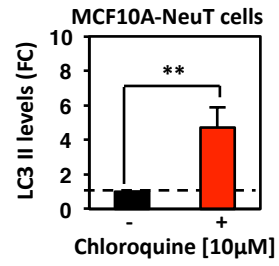

Supplement: NIHMS875725-supplement-3.pdf [file NIHMS875725-supplement-3.pdf]

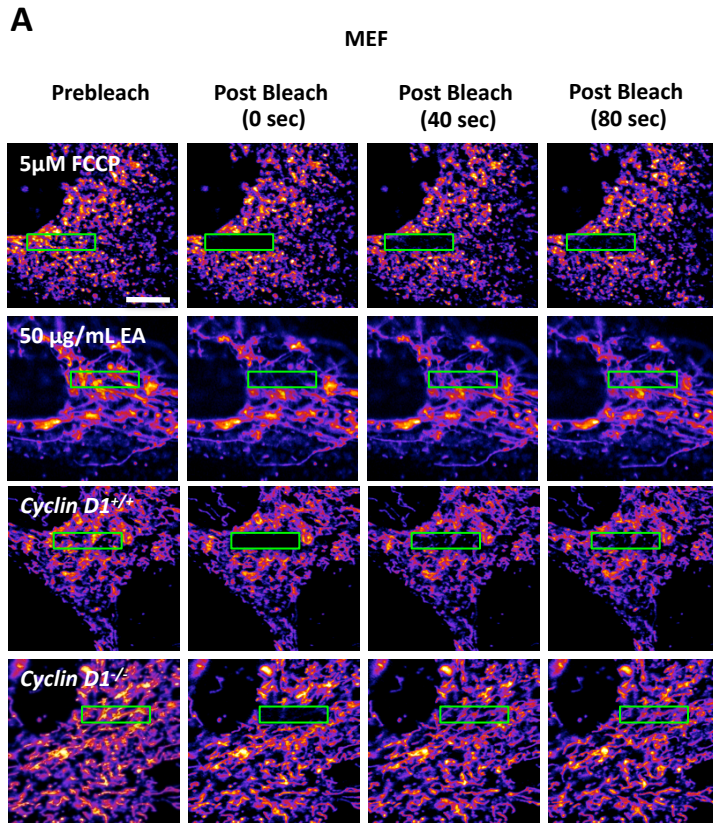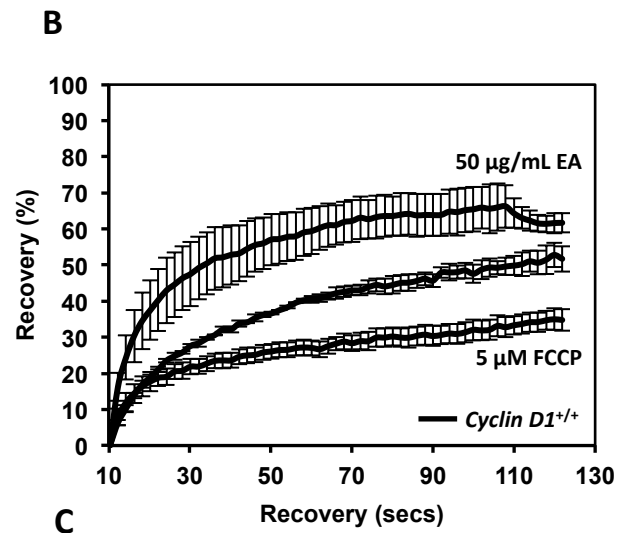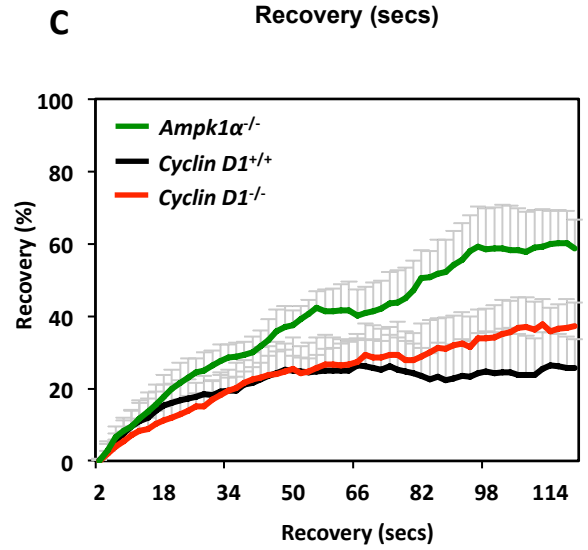

Supplement: NIHMS875725-supplement-4.pdf [file NIHMS875725-supplement-4.pdf]
